# Supplementary material for: Tunable nano-interfaces between MnOx and layered double hydroxides boost oxygen evolving electrocatalysis
Source: Royal Society of Chemistry journal article supplement (doi:10.1039/c8ta07508e), 2018-01-01
Supplement: c8ta07508e1.pdf [file c8ta07508e1.pdf]

Supporting information for:

**Tunable Nano-Interfaces between MnO<sub>x</sub> and Layered Double  
Hydroxides Boost Oxygen Evolving Electrocatalysis**

Yudong Xue,<sup>a,b,c,d</sup> Zachary S. Fishman,<sup>a,c</sup> Jason A. Röhr,<sup>a,c</sup> Zhenhua Pan,<sup>a,c</sup> Yunting  
Wang,<sup>e</sup> Chunhui Zhang,<sup>e</sup> Shili Zheng,<sup>b\*</sup> Yi Zhang<sup>b</sup> and Shu Hu,<sup>a,c\*</sup>

<sup>a</sup> *Department of Chemical and Environmental Engineering, Yale University, New Haven,  
Connecticut 06511, United States.*

<sup>b</sup> *National Engineering Laboratory for Hydrometallurgical Cleaner Production  
Technology, Key Laboratory of Green Process and Engineering, Institute of Process  
Engineering, Chinese Academy of Sciences, Beijing 100190, China.*

<sup>c</sup> *Energy Sciences Institute, Yale University, West Haven, Connecticut 06516, United  
States.*

<sup>d</sup> *University of Chinese Academy of Sciences, Beijing 100049, China*

<sup>e</sup> *School of Chemical and Environmental Engineering, China University of Mining and  
Technology (Beijing), Beijing 100083, China.*

*Corresponding author: Shu Hu, e-mail: shu.hu@yale.edu, Tel: +1-203-737-6521; Shili  
Zheng, e-mail: slzheng@ipe.ac.cn, Tel: +86 10 82544858*

Supplementary Figures (Figures S1 – S5, Tables S1 – S4)

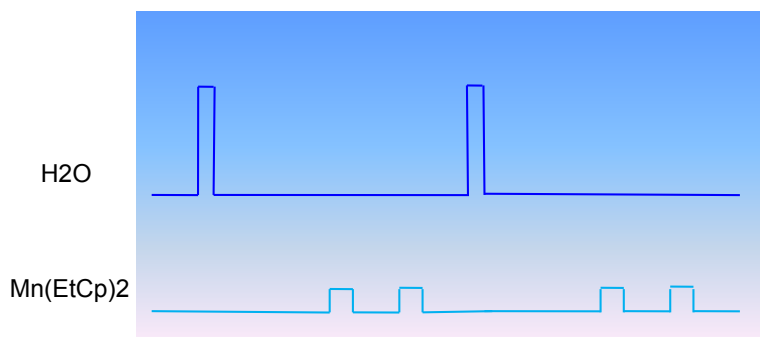

Fig. S1 Schematics for the ALD precursor sequence of growing MnO<sub>x</sub> during each cycle.

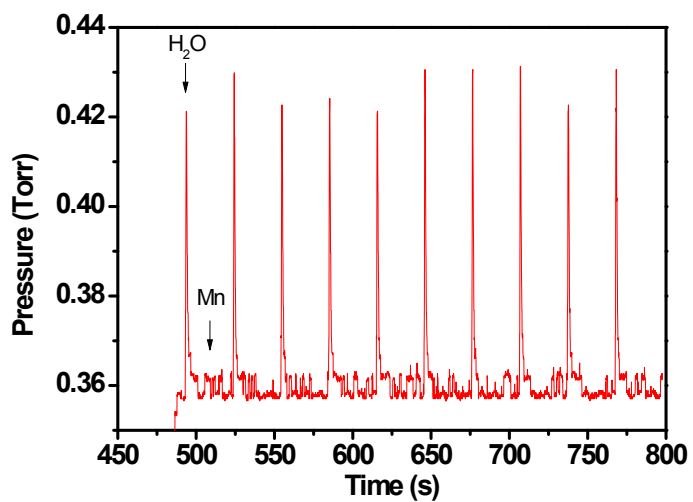

Fig. S2 Recorded ALD pulse sequences by monitoring the reactor pressure as a function of time, when using Mn(EtCp)<sub>2</sub> and H<sub>2</sub>O as the precursor and the co-reactants, respectively, for ALD MnO<sub>x</sub> growth.

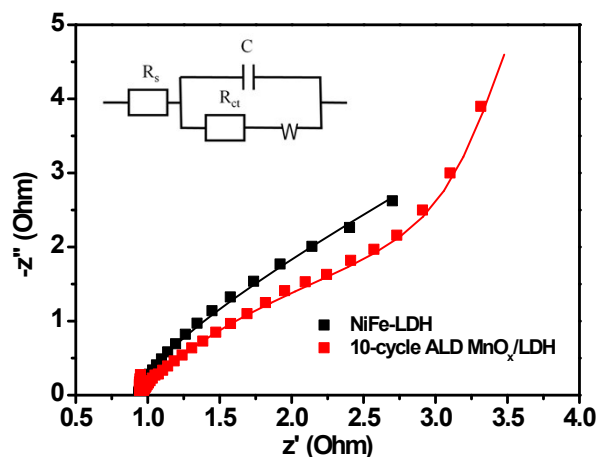

|                                   | Solution resistance<br>(R <sub>s</sub> ), Ω | Charge transfer<br>resistance (R <sub>ct</sub> ), Ω | Capacitance (C),<br>nF cm <sup>-2</sup> |
|-----------------------------------|---------------------------------------------|-----------------------------------------------------|-----------------------------------------|
| NiFe-LDH                          | 0.939                                       | 8.125                                               | 18.597                                  |
| 10-cycle<br>MnO <sub>x</sub> /LDH | 0.938                                       | 5.890                                               | 18.913                                  |

Fig. S3 Nyquist plots of ALD MnO<sub>x</sub>/LDH electrodes held at overpotential of 300 mV and the corresponding equivalent circuitry. Fitted values are listed in the table.

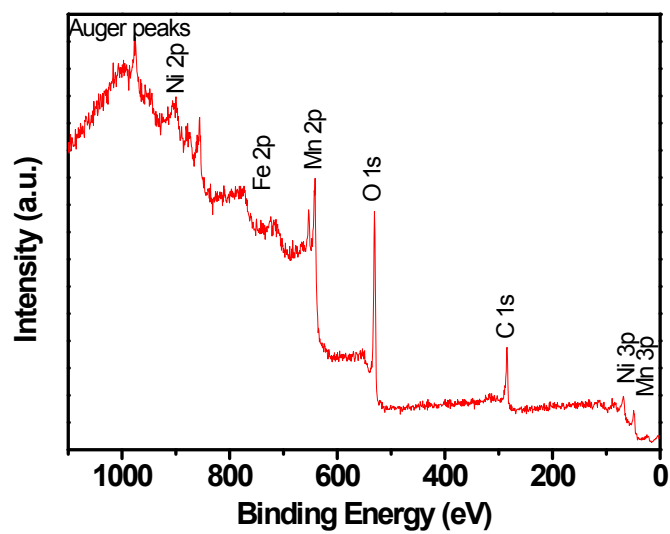

Fig. S4 XPS survey spectrum of 10-cycle ALD  $\text{MnO}_x/\text{NiFe-LDH}$  samples.

Table S1 Fitting parameters used to fit the Mn 2p<sup>3/2</sup> peaks (Pk).

|                                    | Pk 1<br>(eV) | Pk 2<br>(eV) | Pk 3<br>(eV) | Pk 4<br>(eV) | Pk 5<br>(eV) | Pk 6<br>(eV) | FWHM<br>(eV) |
|------------------------------------|--------------|--------------|--------------|--------------|--------------|--------------|--------------|
| MnO <sub>x</sub>                   | 640.2        | 641.2        | 642.1        | 643.05       | 644.2        | 645.9        | 1.23         |
| MnO <sub>x</sub> /LDH<br>before EC | 640.2        | 641.2        | 642.1        | 643.05       | 644.2        | 645.9        | 1.23         |
| MnO <sub>x</sub> /LDH<br>after EC  | 640.2        | 641.2        | 642.1        | 643.05       | 644.2        | 645.9        | 1.23         |

Table S2 Fitting parameters used to fit the Ni 2p<sup>3/2</sup> and Fe 2p<sup>3/2</sup> peaks (Pk).

|                       | Pk Ni2p <sup>3/2</sup> (eV) | Pk Fe2p <sup>3/2</sup> (eV) |
|-----------------------|-----------------------------|-----------------------------|
| MnO <sub>x</sub> /LDH | 856.0                       | 713.0                       |
| NiFe-LDH              | 856.8                       | 715.0                       |

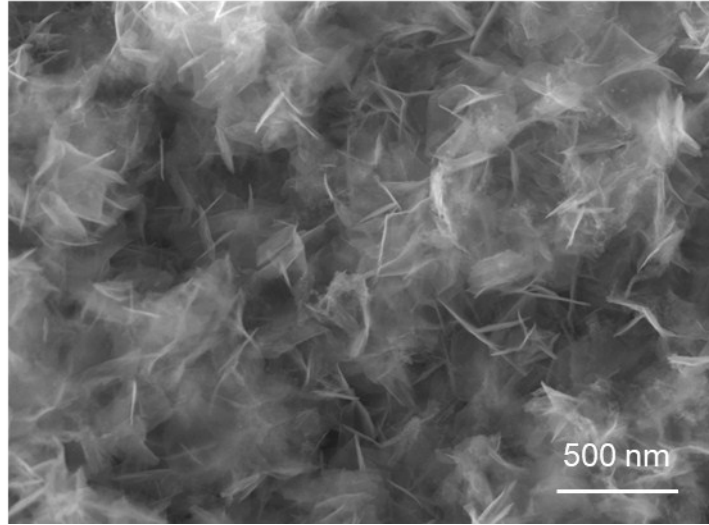

Fig. S5 SEM image of the 10-cycle ALD  $\text{MnO}_x/\text{NiFe-LDH}$  electrode after 10 h stability testing.

Table S3 ICP-MS results of the NiFe-LDH samples.

| Sample                                             | Ni       | Fe       | Mn       |
|----------------------------------------------------|----------|----------|----------|
| NiFe-LDH                                           | 0.441 mg | 0.570 mg | NA       |
| 10 MnO <sub>x</sub> /NiFe-LDH                      | 0.462 mg | 0.559 mg | 0.067 mg |
| 10 MnO <sub>x</sub> /NiFe-LDH after stability test | 0.431 mg | 0.540 mg | 0.053 mg |

Table S4 The TOF values of the as-prepared samples calculated at 300 mV overpotentials.

| Sample                        | TOF (s <sup>-1</sup> ) |
|-------------------------------|------------------------|
| NiFe-LDH                      | 0.0043                 |
| 10 MnO <sub>x</sub> /NiFe-LDH | 0.0066                 |
